# Supplementary material
Source: HighWire-hosted journal article supplement (doi:10.1101/rna.079101.122)
Supplement: Supplemental_Table_S1.xlsx [file Supplemental_Table_S1.xlsx]

## Sheet: Table S1
Supplemental Table S1. Oligos for pre-miRNA and pri-miRNA synthesis
Oligos for individual pre-miRNAs
Pre-miRNA	The oligos used in the oligo extension step	Sequence of the oligos used in the oligo extension step	1st PCR primer	Sequence of 1st PCR primer	2nd PCR primer	Sequence of 2nd PCR primer
Pre-mir-337	F-pre-337	GAAACGGTACCCGGTACCGTCGAACGGCTTCATACAGGAGTTGATGCACAGTTATCCAGCTCCTATATGA	F-T7-HH-pre-337	TAATACGACTCACTATAGGGTGAAGCCGTTCCTGATGAGTCCGTGAGGACGAAACGGTACCCGGTACCGTC	T7-GGG	TAATACGACTCACTATAGGG
	R-pre-337	GAAGAAAGGCATCATATAGGAGCTGGATAACTGTGCATCAACTCCTGTATGAAGCCGTTC
Pre-mir-143	F-pre-143	GGTGCAGTGCTGCATCTCTGGTCAGTTGGGAGTCTGAGATGAAGCACTGTAGCTC	F-T7-HH-pre-143	TAATACGACTCACTATAGGGAGCACTGCACCCTGATGAGTCCGTGAGGACGAAACGGTACCCGGTACCGT
	R-pre-143	GAGCTACAGTGCTTCATCTCAGACTCCCAACTGACCAGAGATGCAGCACT
Pre-mir-216a	F-pre-216a	GAAACGGTACCCGGTACCGTCTAATCTCAGCTGGCAACTGTGAGATGTTCATACAATCCCTCACAGTGGT	F-T7-HH-pre-216a	TAATACGACTCACTATAGGGGCTGAGATTACTGATGAGTCCGTGAGGACGAAACGGTACCCGGTACCGTC
	R-pre-216a	CATAATCCCAGAGACCACTGTGAGGGATTGTATGAACATCTCACAGTTGCCAGCTGAGATTA	R-216a+HDV-RZ	CGAGGAGGCTGGGACCATGCCGGCCCATAATCCCAGAGACCACTGTGAGG
Pre-let-7a-1	F-DNA-let-7a-1	TAATACGACTCACTATAGGGCCTACTACCTCACTGATGAGTCCGTGAGGACGAAACGGTACCCGGTACCGTCTGAGGTAGTAGG	R-let-7a-1-WT+HDV-RZ	CGAGGAGGCTGGGACCATGCCGGCCGAAAGACAGTAGATTGTATAGTTAT
	R-DNA-let-7a-1	GAAAGACAGTAGATTGTATAGTTATCTCCCAGTGGTGGGTGTGACCCTAAAACTATACAACCTACTACCTCAGACGGTACCGG
Pre-let-7a-2	F-DNA-let-7a-2+7c	TAATACGACTCACTATAGGGCTACTACCTCACTGATGAGTCCGTGAGGACGAAACGGTACCCGGTACCGTCTGAGGTAGTAG	R-let-7a-2+HDV-RZ	CGAGGAGGCTGGGACCATGCCGGCCGGAAAGCTAGGAGGCTGTAC
	R-DNA-let-7a-2	GGAAAGCTAGGAGGCTGTACAGTTATCTCCCTTGATGTAATTCTAAACTATACAACCTACTACCTCAGACGGTACCGGGTAC
Pre-let-7a-3	F-DNA-let-7a-3	TAATACGACTCACTATAGGGACCTACTACCTCACTGATGAGTCCGTGAGGACGAAACGGTACCCGGTACCGTCTGAGGTAGTAG	Same with Pre-let-7a-1 (R-let-7a-1-WT+HDV-RZ)
	R-DNA-let-7a-3	GAAAGACAGTAGATTGTATAGTTATCCCATAGCAGGGCAGAGCCCCAAACTATACAACCTACTACCTCAGACGGTACCGGGTAC
Pre-let-7c	F-DNA-let-7a-2+7c	TAATACGACTCACTATAGGGCTACTACCTCACTGATGAGTCCGTGAGGACGAAACGGTACCCGGTACCGTCTGAGGTAGTAG	R-let-7c+HDV-RZ	CGAGGAGGCTGGGACCATGCCGGCCGGAAAGCTAGAAGGTTGTAC
	R-DNA-let-7c	GGAAAGCTAGAAGGTTGTACAGTTAACTCCCAGGGTGTAACTCTAAACCATACAACCTACTACCTCAGACGGTACCGGGTAC
Pre-let-7g	F-DNA-let-7g	TAATACGACTCACTATAGGGCAAACTACTACCTCACTGATGAGTCCGTGAGGACGAAACGGTACCCGGTACCGTCTGAGGTAGTAGTTTG	R-let-7g+HDV-RZ	CGAGGAGGCTGGGACCATGCCGGCCGCAAGGCAGTGGCCTGTACAG
	R-DNA-let-7g	GCAAGGCAGTGGCCTGTACAGTTATCTCCTGTACCGGGTGGTATCATAGACCCTCAAACTGTACAAACTACTACCTCAGACGGTACCGG
Pre-let-7a-1-1U	Same with Pre-let-7a-1 (F-DNA-let-7a-1 and R-DNA-let-7a-1)		R-let-7a-1-monoU+HDV-RZ	CGAGGAGGCTGGGACCATGCCGGCC AGAAAGACAGTAGATTGTATAGTTAT
Pre-let-7a-1-2U			R-let-7a-1-2U+HDV-RZ	CGAGGAGGCTGGGACCATGCCGGCCAAGAAAGACAGTAGATTGTATAGTTAT
Pre-let-7a-1-3U			R-let-7a-1-3U+HDV-RZ	CGAGGAGGCTGGGACCATGCCGGCC AAAGAAAGACAGTAGATTGTATAGTTAT
Pre-let-7a-1-4U			R-let-7a-1-4U+HDV-RZ	CGAGGAGGCTGGGACCATGCCGGCCAAAAGAAAGACAGTAGATTGTATAGTTAT
Pre-let-7a-1-5U			R-let-7a-1-5U+HDV-RZ	CGAGGAGGCTGGGACCATGCCGGCCAAAAAGAAAGACAGTAGATTGTATAGTTAT
Pre-let-7a-1-6U			R-let-7a-1-6U+HDV-RZ	CGAGGAGGCTGGGACCATGCCGGCCAAAAAAGAAAGACAGTAGATTGTATAGTTAT
Pre-let-7a-1-5pA-3pA			F-let-7a-1-HH-A	CTGATGAGTCCGTGAGGACGAAACGGTACCCGGTACCGTCATGAGGTAGTAGGTTGTAT	T7-HH-7a1-A	TAATACGACTCACTATAGGGCCTACTACCTCATCTGATGAGTCCGTGAGGACGAAACGG
			R-let-7a-1-A-HDV	CGAGGAGGCTGGGACCATGCCGGCCTGAAAGACAGTAGATTGTATAGTTAT
Pre-let-7a-1-5pA-3pU			F-let-7a-1-HH-A	CTGATGAGTCCGTGAGGACGAAACGGTACCCGGTACCGTCATGAGGTAGTAGGTTGTAT
			R-let-7a-1-monoU+HDV-RZ	CGAGGAGGCTGGGACCATGCCGGCCAGAAAGACAGTAGATTGTATAGTTAT
Pre-let-7a-1-5pA-3pG			F-let-7a-1-HH-A	CTGATGAGTCCGTGAGGACGAAACGGTACCCGGTACCGTCATGAGGTAGTAGGTTGTAT
			R-let-7a-1-G-HDV	CGAGGAGGCTGGGACCATGCCGGCCCGAAAGACAGTAGATTGTATAGTTAT
Pre-let-7a-1-5pA-3pC			F-let-7a-1-HH-A	CTGATGAGTCCGTGAGGACGAAACGGTACCCGGTACCGTCATGAGGTAGTAGGTTGTAT
			R-let-7a-1-C-HDV	CGAGGAGGCTGGGACCATGCCGGCC GGAAAGACAGTAGATTGTATAGTTAT
Pre-let-7a-1-5pU-3pA			F-let-7a-1-HH-U	CTGATGAGTCCGTGAGGACGAAACGGTACCCGGTACCGTCTTGAGGTAGTAGGTTGTAT	T7-HH-7a1-U	TAATACGACTCACTATAGGGCCTACTACCTCAACTGATGAGTCCGTGAGGACGAAACGG
			R-let-7a-1-A-HDV	CGAGGAGGCTGGGACCATGCCGGCCTGAAAGACAGTAGATTGTATAGTTAT
Pre-let-7a-1-5pU-3pU			F-let-7a-1-HH-U	CTGATGAGTCCGTGAGGACGAAACGGTACCCGGTACCGTCTTGAGGTAGTAGGTTGTAT
			R-let-7a-1-monoU+HDV-RZ	CGAGGAGGCTGGGACCATGCCGGCCAGAAAGACAGTAGATTGTATAGTTAT
Pre-let-7a-1-5pU-3pG			F-let-7a-1-HH-U	CTGATGAGTCCGTGAGGACGAAACGGTACCCGGTACCGTCTTGAGGTAGTAGGTTGTAT
			R-let-7a-1-G-HDV	CGAGGAGGCTGGGACCATGCCGGCCCGAAAGACAGTAGATTGTATAGTTAT
Pre-let-7a-1-5pU-3pC			F-let-7a-1-HH-U	CTGATGAGTCCGTGAGGACGAAACGGTACCCGGTACCGTCTTGAGGTAGTAGGTTGTAT
			R-let-7a-1-C-HDV	CGAGGAGGCTGGGACCATGCCGGCC GGAAAGACAGTAGATTGTATAGTTAT
Pre-let-7a-1-5pG-3pA			F-let-7a-1-HH-G	CTGATGAGTCCGTGAGGACGAAACGGTACCCGGTACCGTCGTGAGGTAGTAGGTTGTAT	T7-HH-7a1-G	TAATACGACTCACTATAGGGCCTACTACCTCACCTGATGAGTCCGTGAGGACGAAACGG
			R-let-7a-1-A-HDV	CGAGGAGGCTGGGACCATGCCGGCCTGAAAGACAGTAGATTGTATAGTTAT
Pre-let-7a-1-5pG-3pU			F-let-7a-1-HH-G	CTGATGAGTCCGTGAGGACGAAACGGTACCCGGTACCGTCGTGAGGTAGTAGGTTGTAT
			R-let-7a-1-monoU+HDV-RZ	CGAGGAGGCTGGGACCATGCCGGCCAGAAAGACAGTAGATTGTATAGTTAT
Pre-let-7a-1-5pG-3pG			F-let-7a-1-HH-G	CTGATGAGTCCGTGAGGACGAAACGGTACCCGGTACCGTCGTGAGGTAGTAGGTTGTAT
			R-let-7a-1-G-HDV	CGAGGAGGCTGGGACCATGCCGGCCCGAAAGACAGTAGATTGTATAGTTAT
Pre-let-7a-1-5pG-3pC			F-let-7a-1-HH-G	CTGATGAGTCCGTGAGGACGAAACGGTACCCGGTACCGTCGTGAGGTAGTAGGTTGTAT
			R-let-7a-1-C-HDV	CGAGGAGGCTGGGACCATGCCGGCC GGAAAGACAGTAGATTGTATAGTTAT
Pre-let-7a-1-5pC-3pA			F-let-7a-1-HH-C	CTGATGAGTCCGTGAGGACGAAACGGTACCCGGTACCGTCCTGAGGTAGTAGGTTGTAT	T7-HH-7a1-C	TAATACGACTCACTATAGGGCCTACTACCTCAGCTGATGAGTCCGTGAGGACGAAACGG
			R-let-7a-1-A-HDV	CGAGGAGGCTGGGACCATGCCGGCCTGAAAGACAGTAGATTGTATAGTTAT
Pre-let-7a-1-5pC-3pU			F-let-7a-1-HH-C	CTGATGAGTCCGTGAGGACGAAACGGTACCCGGTACCGTCCTGAGGTAGTAGGTTGTAT
			R-let-7a-1-monoU+HDV-RZ	CGAGGAGGCTGGGACCATGCCGGCCAGAAAGACAGTAGATTGTATAGTTAT
Pre-let-7a-1-5pC-3pG			F-let-7a-1-HH-C	CTGATGAGTCCGTGAGGACGAAACGGTACCCGGTACCGTCCTGAGGTAGTAGGTTGTAT
			R-let-7a-1-G-HDV	CGAGGAGGCTGGGACCATGCCGGCCCGAAAGACAGTAGATTGTATAGTTAT
Pre-let-7a-1-5pC-3pC			F-let-7a-1-HH-C	CTGATGAGTCCGTGAGGACGAAACGGTACCCGGTACCGTCCTGAGGTAGTAGGTTGTAT
			R-let-7a-1-C-HDV	CGAGGAGGCTGGGACCATGCCGGCC GGAAAGACAGTAGATTGTATAGTTAT
Artificial pre-miRNA (spike-in)	F-spv2	TAATACGACTCACTATAGGGCCGTTCCCTCACTGATGAGTCCGTGAGGACGAAACGGTACCCGGTACCGTCTGAGGGAACGGTTACC	No 1st and 2nd PCR
	R-spv2	GGAAAGGGAATGTTACCTTTGAGAATGCCGATACTCCGAATCACCTCCTCATAGGTAACCGTTCCCTCAGACGGTACCGGGTACCG
Common oligos for all pre-miRNAs
Pre-miRNA	Primer name	Primer sequence (5'-3')	Method
T7	T7-GGG	TAATACGACTCACTATAGGG
HDV ribozyme	F-HDVribozyme	GGCCGGCATGGTCCCAGCCTCCTCGCTGGCGCCGG	PCR
	R-HDVribozyme	GGTCCCATTCGCCATTACCGAGGGGACGGTCC
	Temp-HDVribozyme	GCCTCCTCGCTGGCGCCGGCTGGGCAACATTCCGAGGGGACCGTCCCCTCGGTAATG
Oligos for pri-miRNAs
Pre-miRNA	Primer name	Primer sequence (5'-3')	Method
Pri-mir-216a	F-DNA-pri-216a	TAATACGACTCACTATAGGGAGGTCTAACACGGATGGCTGTGAGTTGGCTTAATCTCAGCTGGCAACTG	PCR with the DNA of corresponding pre-miRNA as template
	R-DNA-pri-216a	TCTTTTGATTCGTGAGGGCTAGGAAATTGCTCTGTTTAGCATAATCCCAGAGACCAC
Pri-let-7a-1	F-DNA-pri-let-7a-1	TAATACGACTCACTATAGGGTTCACCCTGGATGTTCTCTTCACTGTGGGATGAGGTAGTAGGTTGTATAG	PCR with the DNA of corresponding pre-miRNA as template
	R-DNA-pri-let-7a-1	CTATCAGACCGCCTGGATGCAGACTTTTCTATCACGTTAGGAAAGACAGTAGATTGTATAG
Pri-let-7a-2	F-DNA-pri-let-7a-2	TAATACGACTCACTATAGGGTCCAGCCATTGTGACTGCATGCTCCCAGGTTGAGGTAGTAGGTTGTATAG	PCR with the DNA of corresponding pre-miRNA as template
	R-DNA-pri-let-7a-2	TCATGATCGTTCTCACCATGTTGTTTAGTGCAAGACCCAAGGAAAGCTAGGAGGCTGTAC
Pri-let-7a-3	F-DNA-pri-let-7a-3	TAATACGACTCACTATAGGGATCGGCACCAAGACCGACTGCCCTTTGGGGTGAGGTAGTAGGTTGTATAG	PCR with the DNA of corresponding pre-miRNA as template
	R-DNA-pri-let-7a-3	TCCAGACGCTCTGTCCACCGCAGATATTACAGCCACTTCAGGAAAGACAGTAGATTGTATAG
Pri-let-7c	F-DNA-pri-let-7c	TAATACGACTCACTATAGGGAGCAACATTGGAAGCTGTGTGCATCCGGGTTGAGGTAGTAGGTTGTATGG	PCR with the DNA of corresponding pre-miRNA as template
	R-DNA-pri-let-7c	AAGTGATGAAGAATTCCTCGACGGCTCAAGTGTGCTCCAAGGAAAGCTAGAAGGTTGTAC
Pri-let-7g	F-DNA-pri-let-7g	TAATACGACTCACTATAGGGCGCTCCGTTTCCTTTTGCCTGATTCCAGGCTGAGGTAGTAGTTTGTACAG	PCR with the DNA of corresponding pre-miRNA as template
	R-DNA-pri-let-7g	ATCCTCTCAGCCCCACTTGGCAGCTGGCGCGCTGTTCCTGGCAAGGCAGTGGCCTGTAC
