# Supplementary material
Source: HighWire-hosted journal article supplement (doi:10.1101/rna.079101.122)
Supplement: Supplemental_Table_S2.xlsx [file Supplemental_Table_S2.xlsx]

## Sheet: Table S2
Supplemental Table S2. Oligos for iLIME-qPCR and iLIME-seq
Pre-miRNA	Primer set	Reverse transcibe primer (RT primer)	Forward primer PCR	Reverse primer for iLIME-quant (name:sequence)	Reverse primer for iLIME-seq (name:sequence)
Pre-mir-216a	1	CCTTGGCACCCGAGAATTCCAATTGTATGAACATCTCACAGTTGCCAGCTG	GTTCAGAGTTCTACAGTCCGACGATCCCCTCACAGTGGTCTCTGGG	RPI18: CAAGCAGAAGACGGCATACGAGATGCGGACGTGACTGGAGTTCCTTGGCACCCGAGAATTCCA	R-RA3: CCTTGGCACCCGAGAATTCCA
	2		CCCTCACAGTGGTCTCTGGG	RPI18: CAAGCAGAAGACGGCATACGAGATGCGGACGTGACTGGAGTTCCTTGGCACCCGAGAATTCCA
	3		GTTCAGAGTTCTACAGTCCGACGATCCCCTCACAGTGGTCTCTGGG	R-RA3: CCTTGGCACCCGAGAATTCCA
	4		CCCTCACAGTGGTCTCTGGG	R-RA3: CCTTGGCACCCGAGAATTCCA
	5	ATTGTATGAACATCTCACAGTTGCCAGCTG	GTTCAGAGTTCTACAGTCCGACGATCCCCTCACAGTGGTCTCTGGG	CAAGCAGAAGACGGCATACGAGATGCGGACGTGACTGGAGTTATTGTATGAACATCTCACAG
	6		CCCTCACAGTGGTCTCTGGG	CAAGCAGAAGACGGCATACGAGATGCGGACGTGACTGGAGTTATTGTATGAACATCTCACAG
	7		GTTCAGAGTTCTACAGTCCGACGATCCCCTCACAGTGGTCTCTGGG	ATTGTATGAACATCTCACAGTTGCCAGCTG
	8		CCCTCACAGTGGTCTCTGGG	ATTGTATGAACATCTCACAGTTGCCAGCTG
Pre-let-7a-1	1	CCTTGGCACCCGAGAATTCCAGGTGGGTGTGACCCTAAAACTATACAAC	GTTCAGAGTTCTACAGTCCGACGATCACTGGGAGATAACTATACAAT	RPI18: CAAGCAGAAGACGGCATACGAGATGCGGACGTGACTGGAGTTCCTTGGCACCCGAGAATTCCA	R-RA3: CCTTGGCACCCGAGAATTCCA
	2		ACTGGGAGATAACTATACAAT	RPI18: CAAGCAGAAGACGGCATACGAGATGCGGACGTGACTGGAGTTCCTTGGCACCCGAGAATTCCA
	3		GTTCAGAGTTCTACAGTCCGACGATCACTGGGAGATAACTATACAAT	R-RA3: CCTTGGCACCCGAGAATTCCA
	4		ACTGGGAGATAACTATACAAT	R-RA3: CCTTGGCACCCGAGAATTCCA
	5	GGTGGGTGTGACCCTAAAACTATACAAC	GTTCAGAGTTCTACAGTCCGACGATCACTGGGAGATAACTATACAAT	CAAGCAGAAGACGGCATACGAGATGCGGACGTGACTGGAGTTGGTGGGTGTGACCCTAAAAC
	6		ACTGGGAGATAACTATACAAT	CAAGCAGAAGACGGCATACGAGATGCGGACGTGACTGGAGTTGGTGGGTGTGACCCTAAAAC
	7		GTTCAGAGTTCTACAGTCCGACGATCACTGGGAGATAACTATACAAT	GGTGGGTGTGACCCTAAAACTATACAAC
	8		ACTGGGAGATAACTATACAAT	GGTGGGTGTGACCCTAAAACTATACAAC
Pre-let-7a-2	1	CCTTGGCACCCGAGAATTCCATTGATGTAATTCTAAACTATACAACCTA	GTTCAGAGTTCTACAGTCCGACGATCGGGAGATAACTGTACAG	RPI18: CAAGCAGAAGACGGCATACGAGATGCGGACGTGACTGGAGTTCCTTGGCACCCGAGAATTCCA	R-RA3: CCTTGGCACCCGAGAATTCCA
	2		GGGAGATAACTGTACAG	RPI18: CAAGCAGAAGACGGCATACGAGATGCGGACGTGACTGGAGTTCCTTGGCACCCGAGAATTCCA
	3		GTTCAGAGTTCTACAGTCCGACGATCGGGAGATAACTGTACAG	R-RA3: CCTTGGCACCCGAGAATTCCA
	4		GGGAGATAACTGTACAG	R-RA3: CCTTGGCACCCGAGAATTCCA
	5	TTGATGTAATTCTAAACTATACAACCTA	GTTCAGAGTTCTACAGTCCGACGATCGGGAGATAACTGTACAG	CAAGCAGAAGACGGCATACGAGATGCGGACGTGACTGGAGTTTTGATGTAATTCTAAACTATAC
	6		GGGAGATAACTGTACAG	CAAGCAGAAGACGGCATACGAGATGCGGACGTGACTGGAGTTTTGATGTAATTCTAAACTATAC
	7		GTTCAGAGTTCTACAGTCCGACGATCGGGAGATAACTGTACAG	TTGATGTAATTCTAAACTATACAACCTA
	8		GGGAGATAACTGTACAG	TTGATGTAATTCTAAACTATACAACCTA
Pre-let-7a-3	1	CCTTGGCACCCGAGAATTCCACAGGGCAGAGCCCCAAACTATACAACCTACTA	GTTCAGAGTTCTACAGTCCGACGATCCTATGGGATAACTATACAAT	RPI18: CAAGCAGAAGACGGCATACGAGATGCGGACGTGACTGGAGTTCCTTGGCACCCGAGAATTCCA	R-RA3: CCTTGGCACCCGAGAATTCCA
	2		CTATGGGATAACTATACAAT	RPI18: CAAGCAGAAGACGGCATACGAGATGCGGACGTGACTGGAGTTCCTTGGCACCCGAGAATTCCA
	3		GTTCAGAGTTCTACAGTCCGACGATCCTATGGGATAACTATACAAT	R-RA3: CCTTGGCACCCGAGAATTCCA
	4		CTATGGGATAACTATACAAT	R-RA3: CCTTGGCACCCGAGAATTCCA
	5	CAGGGCAGAGCCCCAAACTATACAACCTACTA	GTTCAGAGTTCTACAGTCCGACGATCCTATGGGATAACTATACAAT	CAAGCAGAAGACGGCATACGAGATGCGGACGTGACTGGAGTT CAGGGCAGAGCCCCAAACTATAC
	6		CTATGGGATAACTATACAAT	CAAGCAGAAGACGGCATACGAGATGCGGACGTGACTGGAGTT CAGGGCAGAGCCCCAAACTATAC
	7		GTTCAGAGTTCTACAGTCCGACGATCCTATGGGATAACTATACAAT	CAGGGCAGAGCCCCAAACTATACAACCTACTA
	8		CTATGGGATAACTATACAAT	CAGGGCAGAGCCCCAAACTATACAACCTACTA
Pre-let-7c	1	CCTTGGCACCCGAGAATTCCAAGGGTGTAACTCTAAACCATACAACCTA	GTTCAGAGTTCTACAGTCCGACGATCGGGAGTTAACTGTACAACC	RPI18: CAAGCAGAAGACGGCATACGAGATGCGGACGTGACTGGAGTTCCTTGGCACCCGAGAATTCCA	R-RA3: CCTTGGCACCCGAGAATTCCA
	2		GGGAGTTAACTGTACAACC	RPI18: CAAGCAGAAGACGGCATACGAGATGCGGACGTGACTGGAGTTCCTTGGCACCCGAGAATTCCA
	3		GTTCAGAGTTCTACAGTCCGACGATCGGGAGTTAACTGTACAACC	R-RA3: CCTTGGCACCCGAGAATTCCA
	4		GGGAGTTAACTGTACAACC	R-RA3: CCTTGGCACCCGAGAATTCCA
	5	AGGGTGTAACTCTAAACCATACAACCTA	GTTCAGAGTTCTACAGTCCGACGATCGGGAGTTAACTGTACAACC	CAAGCAGAAGACGGCATACGAGATGCGGACGTGACTGGAGTTAGGGTGTAACTCTAAACCATAC
	6		GGGAGTTAACTGTACAACC	CAAGCAGAAGACGGCATACGAGATGCGGACGTGACTGGAGTTAGGGTGTAACTCTAAACCATAC
	7		GTTCAGAGTTCTACAGTCCGACGATCGGGAGTTAACTGTACAACC	AGGGTGTAACTCTAAACCATACAACCTA
	8		GGGAGTTAACTGTACAACC	AGGGTGTAACTCTAAACCATACAACCTA
Artificial pre-miRNA (spike-in)	7	CCGAATCACCTCCTCATAGGTAACCG	GTTCAGAGTTCTACAGTCCGACGATCAGTATCGGCATTCTCAAAGGTAACA	RT-spike-ins-new12: CCGAATCACCTCCTCATAGGTAACCG	NO iLIME-seq experiment
Pre-let-7b	7	CACTGCCCTGAAACCACACAAC	GTTCAGAGTTCTACAGTCCGACGATCATGTTGCCCCTCGGAAGATAAC	RT-pre-let-7b: CACTGCCCTGAAACCACACAAC	NO iLIME-seq experiment
Pre-let-7f-1	7	CACTACCCCACAACTATACAATC	GTTCAGAGTTCTACAGTCCGACGATCATTTTACCCTGTTCAGGAGATAAC	RT-pre-let-7f-1: CACTACCCCACAACTATACAATC	NO iLIME-seq experiment
Pre-let-7f-2	7	ATGACCCTAAAACTATACAATC	GTTCAGAGTTCTACAGTCCGACGATCACCCCATCTTGGAGATAACTATAC	RT-pre-let-7f-2: ATGACCCTAAAACTATACAATC	NO iLIME-seq experiment
Pre-mir-16-1	7	AATCTTAACGCCAATATTTAC	GTTCAGAGTTCTACAGTCCGACGATCCTAAAATTATCTCCAGTATT	RT-pre-mir-16-1: AATCTTAACGCCAATATTTAC	NO iLIME-seq experiment
Pre-mir-183	7	GTTCACAGTGAATTCTACCAG	GTTCAGAGTTCTACAGTCCGACGATCAGTCTCAGTCAGTGAATTAC	RT-pre-mir-183: GTTCACAGTGAATTCTACCAG	NO iLIME-seq experiment
Pre-mir-27a		CCTTGGCACCCGAGAATTCCAACTTGGTGTGGACCCTGCTCACAAGCAGCT	GTTCAGAGTTCTACAGTCCGACGATCCGTGTTCACAGTGGCTAAG	NO iLIME-qPCR experiment	R-RA3: CCTTGGCACCCGAGAATTCCA
Pre-let-7g		CCTTGGCACCCGAGAATTCCAGGTGGTATCATAGACCCTCAAACTGTACAA	GTTCAGAGTTCTACAGTCCGACGATCCGGTACAGGAGATAACTGTACAG	NO iLIME-qPCR experiment	R-RA3: CCTTGGCACCCGAGAATTCCA
Pre-miR-142		CCTTGGCACCCGAGAATTCCATCCAGTGCTGTTAGTAGTGC	GTTCAGAGTTCTACAGTCCGACGATCGGGTGTAGTGTTTCCTAC	NO iLIME-qPCR experiment	R-RA3: CCTTGGCACCCGAGAATTCCA
Pre-mir-342		CCTTGGCACCCGAGAATTCCATAACCATGTCCCTCAATCACAG	GTTCAGAGTTCTACAGTCCGACGATCATGGAATTGTCTCACACAG	NO iLIME-qPCR experiment	R-RA3: CCTTGGCACCCGAGAATTCCA
Pre-mir-376a-2		CCTTGGCACCCGAGAATTCCACCATCAAACACGTAACCATAG	GTTCAGAGTTCTACAGTCCGACGATCTTAATCATAGAGGAAAATCC	NO iLIME-qPCR experiment	R-RA3: CCTTGGCACCCGAGAATTCCA
