# Supplementary material
Source: HighWire-hosted journal article supplement (doi:10.1101/rna.079101.122)
Supplement: Supplemental_Table_S3.xlsx [file Supplemental_Table_S3.xlsx]

## Sheet: Table S3
Supplemental Table S3. Oligos for pri-miRNA qPCR
Pri-miRNA	Reverse primer qPCR (R-primer)	Forward primer PCR
pri-mir-183	CGGAGGCCCTCGTGGATCTG	GCAGGCCGCAGAGTGTGACTC
pri-mir-16-1	AACACAACTGTAGAGTATGG	GCTCTTATGATAGCAATGTC
pri-let-7b	CCCATGGGGTCGTGTCACTG	CTCCCGCAGTGCAAGGCCGG
pri-let-7f-1	AGAAAATAATGCAGCAAGTC	ATTCCAGAAGAAAACATTGC
pri-let-7f-2	AGCCAGTCGGAGAAGAAGTG	GCTGAAGATGGACACTGGTG
pri-let-7a-1	CTATCAGACCGCCTGGATGCAGACTTTTCTATC	TTCACCCTGGATGTTCTCTTCACTGTG
pri-let-7a-2	TCATGATCGTTCTCACCATGTTGTTTAGTG	TCCAGCCATTGTGACTGCATGCTCCCAG
