# Supplementary material
Source: HighWire-hosted journal article supplement (doi:10.1101/rna.079101.122)
Supplement: Supplemental_Table_S4.xlsx [file Supplemental_Table_S4.xlsx]

## Sheet: Table S4
Supplemental Table S4. Raw data of iLIME-qPCR for synthesized pre-miRNAs using different primer designs (Related to Fig. S2B)
Pre-miRNA	Primer set	Ct value			Relative amplification			AVERAGE relative amplification	AVERAGE Ct value of primer set 1
		Rep1	Rep2	Rep3	Rep1	Rep2	Rep3
Pre-mir-216a	1	23.9867	24.39	24.8033	1.32562	1.00231	0.752623	1.02685	24.3933
	2	23.1233	23.6733	23.75	2.41162	1.64718	1.56193	1.87358
	3	19.5933	19.7533	19.6333	27.8576	24.9333	27.0958	26.6289
	4	23.44	18.6033	18.8233	1.93634	55.3304	47.5048	34.9238
	5	15.1567	15.4333	15.2367	603.273	497.999	570.731	557.334
	6	15.5733	15.6467	15.8033	451.944	429.545	385.343	422.277
	7	13.7567	13.6133	13.72	1592.05	1758.34	1633.03	1661.14
	8	13.1067	13.3467	13.2	2498.19	2115.33	2341.69	2318.4
Pre-let-7a-1	1	27.6733	28.23	28	1.22641	0.833803	0.977913	1.01271	27.9678
	2	40	40	40	0.000238748	0.000238748	0.000238748	0.000238748
	3	12.88	12.8833	12.9233	34823.6	34743.2	33793.2	34453.3
	4	11.9033	11.9367	11.8467	68529.8	66964.6	71275.1	68923.2
	5	16.82	16.44	16.7833	2268.9	2952.62	2327.3	2516.27
	6	23.0367	22.9767	23.5633	30.5079	31.8034	21.1773	27.8295
	7	10.8733	10.8933	11.0333	139940	138013	125249	134401
	8	10.0533	10.1	10.0433	247050	239187	248769	245002
Pre-let-7a-2	1	21.8267	23.4033	23.06	1.9141	0.641713	0.814131	1.12331	22.7633
	2	40	40	37.61	6.4751e-06	6.4751e-06	3.39397e-05	1.563e-05
	3	13.53	13.6167	13.5567	601.881	566.788	590.858	586.509
	4	13.7967	13.9533	13.9333	500.306	448.822	455.087	468.072
	5	19.5433	20.3533	19.8367	9.31787	5.31474	7.60352	7.41204
	6	40	40	40	6.4751e-06	6.4751e-06	6.4751e-06	6.4751e-06
	7	12.1333	12.31	12.3733	1584.71	1402.06	1341.84	1442.87
	8	12.4567	12.69	12.76	1266.53	1077.4	1026.37	1123.43
Pre-let-7a-3	1	24.5933	23.7067	26.765	1.34568	2.48802	0.298679	1.37746	25.0217
	2	40	40	40	3.09794e-05	3.09794e-05	3.09794e-05	3.09794e-05
	3	14.3133	14.4533	14.39	1673.13	1518.4	1586.54	1592.69
	4	14.3733	14.48	14.48	1604.97	1490.59	1490.59	1528.72
	5	19.6867	19.6333	19.87	40.3641	41.8842	35.5473	39.2652
	6	32.9533	34.19	33.4567	0.00409572	0.00173803	0.00288943	0.00290773
	7	13.55	13.5633	13.6833	2839.98	2813.86	2589.28	2747.71
	8	12.6167	12.95	12.8367	5423.47	4304.61	4656.4	4794.83
Pre-let-7c	1	14.36	14.49	14.4367	1.04891	0.958526	0.994623	1.00069	14.4289
	2	31.68	31.4867	31.7967	6.41059e-06	7.32989e-06	5.91259e-06	6.55102e-06
	3	11.0667	11.12	11.1367	10.2832	9.91003	9.7962	9.99649
	4	10.9133	10.92	10.88	11.4364	11.3836	11.7037	11.5079
	5	12.3967	12.68	12.6967	4.09034	3.361	3.32239	3.59124
	6	20.9967	21.3867	21.11	0.0105415	0.00804452	0.00974507	0.00944369
	7	10.3233	10.5167	10.45	17.2145	15.0555	15.7676	16.0125
	8	9.92333	10.0833	10.0667	22.7147	20.3302	20.5665	21.2038
