# Supplementary material
Source: HighWire-hosted journal article supplement (doi:10.1101/rna.079101.122)
Supplement: Supplemental_Table_S5.xlsx [file Supplemental_Table_S5.xlsx]

## Sheet: Table S5
Supplemental Table S5. Raw data of iLIME-qPCR for synthesized pre-miRNAs (Related to Fig. 2d,e, and Fig. S2f)
System	Pre-miRNA	Amount (fmol)	log10(pre-miRNA amount)	Ct value			R² value	Trendline equation
				Rep1	Rep2	Rep3
Synthesized pre-miRNAs	Pre-mir-216a	10	1	14.3967	14.1	13.6667	0.9837	y = -3.69x + 18.318
		1	0	18.2567	17.9933	18.1067
		0.1	-1	22.6767	22.8033	22.9267
		0.01	-2	25.7233	25.7433	25.78
		0.001	-3	30.3467	30.7333	30.62
		0.0001	-4	32.3	31.7567	31.4233
	Pre-let-7a-1	10	1	9.47667	9.61667	9.58	0.9616	y = -4.2729x + 16.047
		1	0	18.4867	18.7433	18.7367
		0.1	-1	20.69	20.68	20.7633
		0.01	-2	24.02	24.15	24.2267
		0.001	-3	29.28	29.3233	29.1833
		0.0001	-4	32.1233	32.6	32.5367
	Pre-let-7a-2	10	1	11.1367	11.3967	11.54	0.9987	y = -4.5179x + 16.222
		1	0	16.56	16.5567	16.6033
		0.1	-1	21.0533	21.0333	21.1167
		0.01	-2	25.0067	24.9767	25.1133
		0.001	-3	29.6333	29.4633	29.6067
		0.0001	-4	34.27	34.15	34.76
	Pre-let-7a-3	10	1	12.5133	12.52	12.3433	0.9914	y = -3.6706x + 17.089
		1	0	17.8467	17.88	17.5633
		0.1	-1	21.1333	21.3967	21.0633
		0.01	-2	24.6933	24.7833	24.8867
		0.001	-3	28.4433	28.2033	27.8567
		0.0001	-4	31.08	31.5367	30.96
	Pre-let-7c	10	1	9.20667	8.98	9.55333	0.9741	y = -4.1317x + 14.753
		1	0	15.6133	15.6667	15.6067
		0.1	-1	20.6933	20.7967	20.9267
		0.01	-2	22.37	22.41	22.22
		0.001	-3	26.0567	26.2367	26.06
		0.0001	-4	31.9267	31.2833	31.5
	Artificial pre-miRNA (Spike-in)	10	1	6.35667	6.28333	6.74667	0.9788	y = -4.8212x + 13.242
		1	0	15.3933	15.4567	15.08
		0.1	-1	17.99	18.8933	18.1833
		0.01	-2	22.8533	23.73	23.0933
		0.001	-3	27.7167	28.0867	27.1867
		0.0001	-4	31.4867	31.8433	32.1433
Synthesized pre-miRNAs in HCT116 DROSHA-KO total RNA	Pre-mir-216a	10	1	16.0133	16.1833	16.0933	0.9887	y = -3.5012x + 20.082
		1	0	20.2733	19.93	20.21
		0.1	-1	24.3967	24.61	24.7333
		0.01	-2	26.9933	26.8433	26.7467
		0.001	-3	29.93	30.5233	30.27
	Pre-let-7a-1	10	1	10.8133	10.9267	10.9367	0.9691	y = -5.191x + 17.446
		1	0	19.6633	19.7167	19.5967
		0.1	-1	21.59	21.76	21.68
		0.01	-2	28.3733	28.5467	28.7533
		0.001	-3	31.3433	32.7467	33.1033
	Pre-let-7a-2	10	1	11.5833	11.6967	11.5067	0.9838	y = -5.3336x + 17.774
		1	0	18.9767	18.8367	18.9833
		0.1	-1	23.8133	23.81	23.6733
		0.01	-2	27.05	26.9833	27.05
		0.001	-3	34.4867	34.3533	33.8067
	Pre-let-7a-3	10	1	17.1267	17.0933	17.06	0.9949	y = -4.6703x + 21.5
		1	0	21.1133	21.0167	21.1267
		0.1	-1	25.8767	25.7933	25.9133
		0.01	-2	31.7267	31.3467	31.8733
		0.001	-3	34.8233	35.2233	35.4433
	Pre-let-7c	10	1	11.0833	11.08	11.37	0.9803	y = -5.4399x + 17.627
		1	0	17.9367	17.86	17.9733
		0.1	-1	25.02	25.0633	25.0833
		0.01	-2	27.6433	27.5733	27.81
		0.001	-3	33.4933	33.2	33.81
	Artificial pre-miRNA (Spike-in)	10	1	6.64667	6.23333	6.15	0.9769	y = -4.9488x + 13.165
		1	0	15.7367	15.3633	15.3367
		0.1	-1	17.7233	18.0867	17.6933
		0.01	-2	22.4667	23.8367	23.4433
		0.001	-3	28.07	28.5867	29.0833
		0.0001	-4	32.2233	31.8533	32.0467
