# Supplementary material
Source: HighWire-hosted journal article supplement (doi:10.1101/rna.079101.122)
Supplement: Supplemental_Table_S6.xlsx [file Supplemental_Table_S6.xlsx]

## Sheet: Table S6
Supplemental Table S6. Raw data of iLIME-qPCR using different primer pairs with different synthesized pre-miRNAs (Related to Fig. 2c)
Pre-miRNA	Primer of pre-miRNA	Ct value			Relative amplification			AVERAGE relative amplification	AVERAGE Ct value of target pre-miRNA
		Rep1	Rep2	Rep3	Rep1	Rep2	Rep3
Pre-mir-216a	Pre-mir-216a	13.17	13.1967	13.4067	1.06273	1.04327	0.901945	1.00265	13.2578
	Pre-let-7a-1	25.9933	26.1433	26.1033	0.000146628	0.000132148	0.000135863	0.000138213
	Pre-let-7a-2	39.3	39.07	40	1.44714e-08	1.69725e-08	8.90818e-09	1.34507e-08
	Pre-let-7a-3	37.7367	39.34	38.17	4.27681e-08	1.40757e-08	3.16719e-08	2.95052e-08
	Pre-let-7c	37.9833	36.2833	38.0633	3.60468e-08	1.17116e-07	3.41023e-08	6.24218e-08
Pre-let-7a-1	Pre-mir-216a	24.3733	24.5067	24.3167	5.20006e-05	4.74102e-05	5.40838e-05	5.11649e-05
	Pre-let-7a-1	10.05	10.41	9.96667	1.06601	0.830598	1.1294	1.00867	10.1422
	Pre-let-7a-2	27.7067	27.86	27.87	5.15912e-06	4.63893e-06	4.60688e-06	4.80164e-06
	Pre-let-7a-3	28.7533	28.6133	28.7933	2.49745e-06	2.75196e-06	2.42916e-06	2.55952e-06
	Pre-let-7c	34.95	35.1033	35.3767	3.40498e-08	3.06166e-08	2.53323e-08	2.99996e-08
Pre-let-7a-2	Pre-mir-216a	28.2767	28.6733	28.5633	5.86723e-06	4.45681e-06	4.80992e-06	5.04466e-06
	Pre-let-7a-1	22.1	22.0433	22.18	0.000424419	0.000441421	0.000401525	0.000422455
	Pre-let-7a-2	10.98	10.9	10.8133	0.944602	0.998461	1.06028	1.00111	10.8978
	Pre-let-7a-3	22.5133	22.6567	22.42	0.000318691	0.00028855	0.000339989	0.000315744
	Pre-let-7c	22.89	23.0767	22.9367	0.00024546	0.00021567	0.000237648	0.000232926
Pre-let-7a-3	Pre-mir-216a	28.6967	28.73	28.64	1.12218e-05	1.09655e-05	1.16714e-05	1.12862e-05
	Pre-let-7a-1	24.2033	24.3567	24.45	0.00025275	0.000227266	0.000213028	0.000231015
	Pre-let-7a-2	23.6033	23.88	23.8567	0.000383098	0.000316246	0.000321402	0.000340248
	Pre-let-7a-3	12.33	12.1667	12.2633	0.948246	1.06191	0.993092	1.00108	12.2533
	Pre-let-7c	22.3867	22.42	22.4767	0.000890354	0.000870018	0.000836508	0.000865627
Pre-let-7c	Pre-mir-216a	28.9067	29.0867	29.4433	1.61255e-06	1.42341e-06	1.11163e-06	1.38253e-06
	Pre-let-7a-1	25.2067	25.06	25.3033	2.09568e-05	2.31994e-05	1.95986e-05	2.12516e-05
	Pre-let-7a-2	21.66	21.27	21.185	0.000244894	0.000320907	0.000340382	0.000302061
	Pre-let-7a-3	27.8	27.39	27.4833	3.47259e-06	4.61398e-06	4.32494e-06	4.13717e-06
	Pre-let-7c	9.60333	9.76	9.63	1.04327	0.935912	1.02416	1.00111	9.66444
