# Supplementary material
Source: HighWire-hosted journal article supplement (doi:10.1101/rna.079101.122)
Supplement: Supplemental_Table_S7.xlsx [file Supplemental_Table_S7.xlsx]

## Sheet: Table S7
Supplemental Table S7. Raw data of iLIME-qPCR of endogenous pre-miRNAs (Related to Fig. 2f)
Pre-miRNA	Ct value									Relative amplification to HCT116 after Spike-ins and u6 normalization									P(T<=t) two-tail compared to HCT116 (t-Test: Two-Sample Assuming Unequal Variances)
	HCT116 total RNA			DROSHA-KO total RNA			DICER-KO total RNA			HCT116 total RNA			DROSHA-KO total RNA			DICER-KO total RNA
	Rep1	Rep2	Rep3	Rep1	Rep2	Rep3	Rep1	Rep2	Rep3	Rep1	Rep2	Rep3	Rep1	Rep2	Rep3	Rep1	Rep2	Rep3	DROSHA-KO sample	DICER-KO sample
Spike-in	22.44	22.0333	22.3	22.8967	22.79	22.8167	22.3167	22.72	22.63
Pre-let-7a-1	23.11	23.56	23.45	35.0167	35.2633	34.95	19.2767	19.3367	19.1333	1.32205	0.730071	0.94788	0.000289552	0.000226653	0.000286888	19.3301	24.5238	26.528	0.0286209	0.00905321
Pre-let-7a-2	24.4667	24.8	24.6367	36.0667	35.8267	35.6467	22.2733	22.5533	21.9767	1.2472	0.74675	1.00605	0.000337856	0.000370569	0.000427644	5.85106	6.37325	8.93023	0.0202632	0.0243657
Pre-let-7b	25.7033	26.1467	25.7733	38.6567	36.83	38.65	21.9433	21.87	21.9267	1.24002	0.687942	1.07204	0.00013147	0.000433112	0.000124955	17.2321	23.9789	21.661	0.0256841	0.00975691
Pre-let-7f-1	25.3667	25.1767	25.5967	40	40	40	22.2633	23.01	22.98	1.13881	0.980003	0.88119	3.76808e-05	3.49954e-05	3.56483e-05	10.0389	7.91281	7.59048	0.00558386	0.010384
Pre-let-7f-2	32.335	32.5067	32.8133	40	40	40	28.5767	28.76	28.0533	1.29246	0.865606	0.841936	0.00535505	0.00497341	0.00506619	17.9401	20.8954	32.0396	0.0209724	0.0342049
Spike-in	25.5	25.9933	25.7033	25.0467	24.98	24.9533	25.5267	25.44	25.5233
Pre-mir-16-1	33.8667	34.6433	34.9667	38.0033	39.72	38.8333	27.11	27.2233	27.21	1.27182	1.04505	0.68313	0.0323572	0.00940015	0.0170616	156.523	136.261	145.704	0.0292834	0.00162348
Pre-mir-183	29.86	29.6767	29.1733	40	40	40	24.92	25.35	25.6267	0.673912	1.07721	1.24888	0.000267279	0.000255209	0.000250535	23.5442	16.457	14.393	0.0278463	0.0252741
			HCT116	DROSHA KO	DICER KO
		u6 Ct value	13.5	12.7933	13.66
