# Supplementary material
Source: HighWire-hosted journal article supplement (doi:10.1101/rna.079101.122)
Supplement: Supplemental_Table_S8.xlsx [file Supplemental_Table_S8.xlsx]

## Sheet: Table S8
Supplemental Table S8. Raw data of iLIME-qPCR for endogenous pri-miRNAs (Related to Fig. 2g)
Pri-miRNA	Ct value									Relative amplification to HCT116 after GAPDH normalization									P(T<=t) two-tail compared to HCT116 (t-Test: Two-Sample Assuming Unequal Variances)
	HCT116 total RNA			DROSHA-KO total RNA			DICER-KO total RNA			HCT116 total RNA			DROSHA-KO total RNA			DICER-KO total RNA
	Rep1	Rep2	Rep3	Rep1	Rep2	Rep3	Rep1	Rep2	Rep3	Rep1	Rep2	Rep3	Rep1	Rep2	Rep3	Rep1	Rep2	Rep3	DROSHA-KO sample	DICER-KO sample
GAPDH	14.1433	14.3267	14.3667	13.5367	13.63	13.63	13.7167	13.8233	13.8367
Pri-let-7a-1	29.5067	29.4533	29.4	23.1467	23.1733	23.15	30.1233	29.88	29.9667	0.873291	1.02897	1.09774	47.1069	49.3348	50.1392	0.423725	0.540064	0.513298	0.00036081	0.00662385
Pri-let-7a-2	23.94	23.92	24.04	22.86	22.8433	22.84	27.46	27.4267	27.4	0.925753	1.06587	1.00838	1.28524	1.38706	1.39027	0.0600386	0.0661568	0.0680167	0.00266612	0.00189172
GAPDH	16.0167	16.1367	16.0533	15.27	15.2067	15.28	13.5467	13.59	13.6267
Pri-let-7b	30.54	30.6067	30.57	25.4867	25.3733	25.55	27.3933	27.46	27.33	0.986099	1.02324	0.990666	19.5144	20.2026	18.8062	1.57622	1.55093	1.74086	0.000474486	0.00936401
Pri-let-7f-1	39.54	37.7833	38.0533	36.0467	33.5367	34.75	38.68	35.07	36.42	0.397519	1.45979	1.14269	2.66801	14.5448	6.59984	0.130227	1.63856	0.659341	0.186528	0.743047
Pri-let-7f-2	31.7733	31.28	32.0467	26.3933	26.48	26.4167	28.06	28.1733	28.05	0.88797	1.35841	0.753623	22.0379	19.8617	21.8352	2.10222	2.00266	2.23754	0.00125511	0.0107255
Pri-mir-16-1	40	40	40	33.2467	31.8233	33.4433	39.9833	38.0533	39.5533	0.963863	1.04746	0.988674	61.9729	159.075	54.4515	0.17599	0.691068	0.250619	0.114437	0.0610741
Pri-mir-183	31.97	32.63	32.48	22.8233	22.9167	22.8	25.7833	25.9033	25.7633	1.24581	0.856833	0.897356	420.828	377.523	430.664	16.3787	15.5311	17.5543	0.00159168	0.00149468
